# Supplementary material for: Synergies for Improving Oil Palm Production and Forest Conservation in Floodplain Landscapes
Source: PLoS One. 2014 Jun 2;9(6):e95388. doi: 10.1371/journal.pone.0095388 (PMC4041647; doi:10.1371/journal.pone.0095388)
Supplement: File S2 — Excel economic models for four oil palm classes including: Full stand 100% palm capacity (136 SPH) (Table S1(a)); Full stand at 76% palm capacity (103 SPH) (Table S1(b)); Underproductive at 75% at 75% capacity (102 SPH) (Table S2(a)); Underproductive at 75% at 51% capacity (69 SPH) (Table S2(b)); Underproductive at 50% at 50% capacity (68 SPH) (Table S3(a)); Underproductive at 50% at 26% capacity (35 SPH) (Table S3(b)); Underproductive at 25% at 25% capacity (34 SPH) (Table S4(a)); Underproductive at 25% at 0% capacity (0 SPH) (Table S4(b)); Discounted summaries (Table S5); Yield curve (Figure S2). The authors are solely responsible for the content and functionality of these materials. Queries (other than absence of the material) should be directed to the corresponding author. (XLSX) [file pone.0095388.s002.xlsx]

## Sheet: Table S1(a + b) Full Stand
COST OF PRODUCTION:
Buisness-as-Usual with FULL STAND (135 palms per hectare)
Discount rate			0.11
Conversion rate US$1 = RM3.2 (Malaysian Ringgit)			3.2
Cropping life (years)			25
Table S1(a)_FULL STAND 100% palm capacity (136 SPH)			Planted out			Young mature				Mature													Old Mature
Year, After Planting		0	0	1	2	3	4	5	6	7	8	9	10	11	12	13	14	15	16	17	18	19	20	21	22	23	24
Theoretical years	0	2010	2011	2012	2013	2014	2015	2016	2017	2018	2019	2020	2021	2022	2023	2024	2025	2026	2027	2028	2029	2030	2031	2032	2033	2034	2035
REVENUE
(1) Projected Yield, t/FFB/ha	Full stand	1	0	0	6	16	21	24.5	27	28	30	30	30	30	29.5	28.5	27.5	26.5	26	24.5	23.5	22.5	21.5	20.5	19.5	18.5	17
(2) Price, RM/tFFB (2011price RM535 t/FFB)		535	0	0	535	535	535	535	535	535	535	535	535	535	535	535	535	535	535	535	535	535	535	535	535	535	535
(3) Income (1)*(2), at RM/ha			0	0	3210	8560	11235	13107.5	14445	14980	16050	16050	16050	16050	15782.5	15247.5	14712.5	14177.5	13910	13107.5	12572.5	12037.5	11502.5	10967.5	10432.5	9897.5	9095
OPPERATION COSTS
(4) Non-recurrent costs for New Plantings (RM/ha)				0	0	0	0	0	0	0	0	0	0	0	0	0	0	0	0	0	0	0	0	0	0	0	0
(5) General Charges (or Joint estate costs), RM/ha			650	650	650	650	650	650	650	650	650	650	650	650	650	650	650	650	650	650	650	650	650	650	650	650	650
(6) Field Upkeep, RM/ha
Weeding/Lallang			450	250	200	200	180	150	150	150	150	150	150	150	150	150	150	150	150	150	150	150	150	150	150	150	150
Manuring (or Fertiliser, Application, Foliar analysis)			500	1000	1800	1800	1800	1800	1800	1800	1800	1800	1800	1800	1800	1800	1800	1800	1800	1800	1800	1800	1800	1800	1800	1800	1800
Pruning			15	15	30	30	30	30	30	30	30	30	30	30	30	30	30	30	30	30	30	37.5	37.5	37.5	37.5	37.5	37.5
Pests & Diseases			30	15	5	5	5	5	5	5	5	5	5	5	5	5	5	5	5	5	5	5	5	5	5	5	5
Census/Survey/Supplying			150	50	10	10	10	10	10	10	10	10	10	10	10	10	10	10	10	10	10	10	10	10	10	10	10
Roads, Bridges, Paths, Drains			200	200	200	200	200	200	200	200	200	200	200	200	200	200	200	200	200	200	200	200	200	200	200	200	200
Soil/Water Conservation			15	15	10	10	10	10	10	10	10	10	10	10	10	10	10	10	10	10	10	10	10	10	10	10	10
Ablation			100	30	25	0	0	0	0	0	0	0	0	0	0	0	0	0	0	0	0	0	0	0	0	0	0
Boundaries and survey/cover crops			188.47	100.48	53.34	0	0	0	0	0	0	0	0	0	0	0	0	0	0	0	0	0	0	0	0	0	0
Mandore wages/direct field supervision			35.98	35.98	35.98	35.98	35.98	35.98	35.98	35.98	35.98	35.98	35.98	35.98	35.98	35.98	35.98	35.98	35.98	35.98	35.98	35.98	35.98	35.98	35.98	35.98	35.98
Tools			2	2	2	2	2	2	2	2	2	2	2	2	2	2	2	2	2	2	2	2	2	2	2	2	2
Miscellaneous/Sundry expenses			20	20	20	20	20	20	20	20	20	20	20	20	20	20	20	20	20	20	20	20	20	20	20	20	20
Total Field Upkeep, RM/ha			1706.45	1733.46	2391.32	2312.98	2292.98	2262.98	2262.98	2262.98	2262.98	2262.98	2262.98	2262.98	2262.98	2262.98	2262.98	2262.98	2262.98	2262.98	2262.98	2270.48	2270.48	2270.48	2270.48	2270.48	2270.48
(7) Harvestingting/Transpt, at RM/tFFB		50	0	0	300	800	1050	1225	1350	1400	1500	1500	1500	1500	1475	1425	1375	1325	1300	1225	1175	1237.5	1118	1066	1014	962	884
(9) Total Costs, (4)+(5)+(6)+(7), (8) RM/ha			2356.45	2383.46	3341.32	3762.98	3992.98	4137.98	4262.98	4312.98	4412.98	4412.98	4412.98	4412.98	4387.98	4337.98	4287.98	4237.98	4212.98	4137.98	4087.98	4157.98	4038.48	3986.48	3934.48	3882.48	3804.48
(10) Net Income (3)-(8), RM/ha			-2356.45	-2383.46	-131.32	4797.02	7242.02	8969.52	10182	10667	11637	11637	11637	11637	11394.5	10909.5	10424.5	9939.52	9697.02	8969.52	8484.52	7879.52	7464.02	6981.02	6498.02	6015.02	5290.52
(11) Capitalised (NPV), RM/ha @		0.11		50983
(12) Reversion Basic Ld Val, RM/ha			42231
(13) Defer Over (Cropping) Remaining Life @	25	0.05	0.295303
(14) Deferred Basic Ld Val, RM/ha				12471
(15) M V (11)+(14), RM/ha				63454
(12) Net Present Value of Oil palm Total for a 25 year period			RM/ha/yr-25	50983
			$/ha yr -25	15932.2
(13) Averaged Net Present Value of Oil Palm per hectare			RM/ha/yr-1	2039.32
			$/ha yr -1	637.288
Table S1(b)_FULL STAND at 76% palm capacity (103 SPH)			Planted out			Young mature				Mature													Old Mature
Year, After Planting		0	0	1	2	3	4	5	6	7	8	9	10	11	12	13	14	15	16	17	18	19	20	21	22	23	24
Theoretical years	0	2010	2011	2012	2013	2014	2015	2016	2017	2018	2019	2020	2021	2022	2023	2024	2025	2026	2027	2028	2029	2030	2031	2032	2033	2034	2035
REVENUE
(1) Projected Yield, t/FFB/ha	Full stand	0.76	0	0	4.56	12.16	15.96	18.62	20.52	21.28	22.8	22.8	22.8	22.8	22.42	21.66	20.9	20.14	19.76	18.62	17.86	17.1	16.34	15.58	14.82	14.06	12.92
(2) Price, RM/tFFB (2011price RM535 t/FFB)		535	0	0	535	535	535	535	535	535	535	535	535	535	535	535	535	535	535	535	535	535	535	535	535	535	535
(3) Income (1)*(2), at RM/ha			0	0	2439.6	6505.6	8538.6	9961.7	10978.2	11384.8	12198	12198	12198	12198	11994.7	11588.1	11181.5	10774.9	10571.6	9961.7	9555.1	9148.5	8741.9	8335.3	7928.7	7522.1	6912.2
OPPERATION COSTS
(4) Non-recurrent costs for New Plantings (RM/ha)				0	0	0	0	0	0	0	0	0	0	0	0	0	0	0	0	0	0	0	0	0	0	0	0
(5) General Charges (or Joint estate costs), RM/ha			650	650	650	650	650	650	650	650	650	650	650	650	650	650	650	650	650	650	650	650	650	650	650	650	650
(6) Field Upkeep, RM/ha
Weeding/Lallang			450	250	200	200	180	150	150	150	150	150	150	150	150	150	150	150	150	150	150	150	150	150	150	150	150
Manuring (or Fertiliser, Application, Foliar analysis)			500	1000	1800	1800	1800	1800	1800	1800	1800	1800	1800	1800	1800	1800	1800	1800	1800	1800	1800	1800	1800	1800	1800	1800	1800
Pruning			15	15	30	30	30	30	30	30	30	30	30	30	30	30	30	30	30	30	30	37.5	37.5	37.5	37.5	37.5	37.5
Pests & Diseases			30	15	5	5	5	5	5	5	5	5	5	5	5	5	5	5	5	5	5	5	5	5	5	5	5
Census/Survey/Supplying			150	50	10	10	10	10	10	10	10	10	10	10	10	10	10	10	10	10	10	10	10	10	10	10	10
Roads, Bridges, Paths, Drains			200	200	200	200	200	200	200	200	200	200	200	200	200	200	200	200	200	200	200	200	200	200	200	200	200
Soil/Water Conservation			15	15	10	10	10	10	10	10	10	10	10	10	10	10	10	10	10	10	10	10	10	10	10	10	10
Ablation			100	30	25	0	0	0	0	0	0	0	0	0	0	0	0	0	0	0	0	0	0	0	0	0	0
Boundaries and survey/cover crops			188.47	100.48	53.34	0	0	0	0	0	0	0	0	0	0	0	0	0	0	0	0	0	0	0	0	0	0
Mandore wages/direct field supervision			35.98	35.98	35.98	35.98	35.98	35.98	35.98	35.98	35.98	35.98	35.98	35.98	35.98	35.98	35.98	35.98	35.98	35.98	35.98	35.98	35.98	35.98	35.98	35.98	35.98
Tools			2	2	2	2	2	2	2	2	2	2	2	2	2	2	2	2	2	2	2	2	2	2	2	2	2
Miscellaneous/Sundry expenses			20	20	20	20	20	20	20	20	20	20	20	20	20	20	20	20	20	20	20	20	20	20	20	20	20
Total Field Upkeep, RM/ha			1706.45	1733.46	2391.32	2312.98	2292.98	2262.98	2262.98	2262.98	2262.98	2262.98	2262.98	2262.98	2262.98	2262.98	2262.98	2262.98	2262.98	2262.98	2262.98	2270.48	2270.48	2270.48	2270.48	2270.48	2270.48
(7) Harvestingting/Transpt, at RM/tFFB		50	0	0	228	608	798	931	1026	1064	1140	1140	1140	1140	1121	1083	1045	1007	988	931	893	940.5	849.68	810.16	770.64	731.12	671.84
(9) Total Costs, (4)+(5)+(6)+(7), (8) RM/ha			2356.45	2383.46	3269.32	3570.98	3740.98	3843.98	3938.98	3976.98	4052.98	4052.98	4052.98	4052.98	4033.98	3995.98	3957.98	3919.98	3900.98	3843.98	3805.98	3860.98	3770.16	3730.64	3691.12	3651.6	3592.32
(10) Net Income (3)-(8), RM/ha			-2356.45	-2383.46	-829.72	2934.62	4797.62	6117.72	7039.22	7407.82	8145.02	8145.02	8145.02	8145.02	7960.72	7592.12	7223.52	6854.92	6670.62	6117.72	5749.12	5287.52	4971.74	4604.66	4237.58	3870.5	3319.88
(11) Capitalised (NPV), RM/ha @		0.11		33047
(12) Reversion Basic Ld Val, RM/ha			42231
(13) Defer Over (Cropping) Remaining Life @	25	0.05	0.295303
(14) Deferred Basic Ld Val, RM/ha				12471
(15) M V (11)+(14), RM/ha				45518
(12) Net Present Value of Oil palm Total for a 25 year period			RM/ha/yr-25	33047
			$/ha yr -25	10327.2
(13) Averaged Net Present Value of Oil Palm per hectare			RM/ha/yr-1	1321.88
			$/ha yr -1	413.087
Year, After Planting		0	0	1	2	3	4	5	6	7	8	9	10	11	12	13	14	15	16	17	18	19	20	21	22	23	24
(1) Projected Yield, t/FFB/ha	Full stand	100% SPH	0	0	6	16	21	24.5	27	28	30	30	30	30	29.5	28.5	27.5	26.5	26	24.5	23.5	22.5	21.5	20.5	19.5	18.5	17
(1) Projected Yield, t/FFB/ha	Full stand	76% SPH	0	0	4.56	12.16	15.96	18.62	20.52	21.28	22.8	22.8	22.8	22.8	22.42	21.66	20.9	20.14	19.76	18.62	17.86	17.1	16.34	15.58	14.82	14.06	12.92

## Sheet: Table S2(a + b) U at 75%
COST OF PRODUCTION:
Buisness-as-Usual with FULL STAND (135 palms per hectare)
Discount rate			0.11
Conversion rate US$1 = RM3.2 (Malaysian Ringgit)			3.2
Cropping life (years)			25
Table S2(a)_Underproductive at 75% at 75% capacity (102 SPH)			Planted out			Young mature				Mature													Old Mature
Year, After Planting			0	1	2	3	4	5	6	7	8	9	10	11	12	13	14	15	16	17	18	19	20	21	22	23	24
	0		2011	2012	2013	2014	2015	2016	2017	2018	2019	2020	2021	2022	2023	2024	2025	2026	2027	2028	2029	2030	2031	2032	2033	2034	2035
REVENUE
(1) Projected Yield, t/FFB/ha	Underproductive at 75%	0.75	0	0	4.5	12	15.75	18.375	20.25	21	22.5	22.5	22.5	22.5	22.125	21.375	20.625	19.875	19.5	18.375	17.625	16.875	16.125	15.375	14.625	13.875	12.25
(2) Price, RM/tFFB (2011price RM535 t/FFB) + Premium		535	0	0	535	535	535	535	535	535	535	535	535	535	535	535	535	535	535	535	535	535	535	535	535	535	535
(3) Income (1)*(2), at RM/ha			0	0	2407.5	6420	8426.25	9830.62	10833.8	11235	12037.5	12037.5	12037.5	12037.5	11836.9	11435.6	11034.4	10633.1	10432.5	9830.62	9429.38	9028.12	8626.88	8225.62	7824.38	7423.12	6553.75
OPPERATION COSTS
(4) Non-recurrent costs for New Plantings (RM/ha)			0	0	0	0	0	0	0	0	0	0	0	0	0	0	0	0	0	0	0	0	0	0	0	0	1
(5) General Charges (or Joint estate costs), RM/ha			650	650	650	650	650	650	650	650	650	650	650	650	650	650	650	650	650	650	650	650	650	650	650	650	650
(6) Field Upkeep, RM/ha
Weeding/Lallang			450	250	200	200	180	150	150	150	150	150	150	150	150	150	150	150	150	150	150	150	150	150	150	150	150
Manuring (or Fertiliser, Application, Foliar analysis)			500	1000	1800	1800	1800	1800	1800	1800	1800	1800	1800	1800	1800	1800	1800	1800	1800	1800	1800	1800	1800	1800	1800	1800	1800
Pruning			15	15	30	30	30	30	30	30	30	30	30	30	30	30	30	30	30	30	30	37.5	37.5	37.5	37.5	37.5	37.5
Pests & Diseases			30	15	5	5	5	5	5	5	5	5	5	5	5	5	5	5	5	5	5	5	5	5	5	5	5
Census/Survey/Supplying			187.5	62.5	10	10	10	10	10	10	10	10	10	10	10	10	10	10	10	10	10	10	10	10	10	10	10
Roads, Bridges, Paths, Drains			200	200	200	200	200	200	200	200	200	200	200	200	200	200	200	200	200	200	200	200	200	200	200	200	200
Soil/Water Conservation			15	15	10	10	10	10	10	10	10	10	10	10	10	10	10	10	10	10	10	10	10	10	10	10	10
Ablation			100	30	25	0	0	0	0	0	0	0	0	0	0	0	0	0	0	0	0	0	0	0	0	0	0
Boundaries and survey/cover crops			188.47	100.48	53.34	0	0	0	0	0	0	0	0	0	0	0	0	0	0	0	0	0	0	0	0	0	0
Mandore wages/direct field supervision			35.98	35.98	35.98	35.98	35.98	35.98	35.98	35.98	35.98	35.98	35.98	35.98	35.98	35.98	35.98	35.98	35.98	35.98	35.98	35.98	35.98	35.98	35.98	35.98	35.98
Tools			2	2	2	2	2	2	2	2	2	2	2	2	2	2	2	2	2	2	2	2	2	2	2	2	2
Miscellaneous/Sundry expenses			20	20	20	20	20	20	20	20	20	20	20	20	20	20	20	20	20	20	20	20	20	20	20	20	20
Total Field Upkeep, RM/ha			1743.95	1745.96	2391.32	2312.98	2292.98	2262.98	2262.98	2262.98	2262.98	2262.98	2262.98	2262.98	2262.98	2262.98	2262.98	2262.98	2262.98	2262.98	2262.98	2270.48	2270.48	2270.48	2270.48	2270.48	2270.48
(7) Harvestingting/Transpt, at RM/tFFB		50	0	0	225	600	787.5	918.75	1012.5	1050	1125	1125	1125	1125	1106.25	1068.75	1031.25	993.75	975	918.75	881.25	928.125	838.5	799.5	760.5	721.5	637
(9) Total Costs, (4)+(5)+(6)+(7), (8) RM/ha			2393.95	2395.96	3266.32	3562.98	3730.48	3831.73	3925.48	3962.98	4037.98	4037.98	4037.98	4037.98	4019.23	3981.73	3944.23	3906.73	3887.98	3831.73	3794.23	3848.61	3758.98	3719.98	3680.98	3641.98	3558.48
(10) Net Income (3)-(8), RM/ha			-2393.95	-2395.96	-858.82	2857.02	4695.77	5998.9	6908.27	7272.02	7999.52	7999.52	7999.52	7999.52	7817.65	7453.9	7090.15	6726.4	6544.52	5998.9	5635.15	5179.52	4867.9	4505.65	4143.4	3781.14	2995.27
(11) Capitalised (NPV), RM/ha @		0.11		32238
(12) Reversion Basic Ld Val, RM/ha			42231
(13) Defer Over Cropping Life @	25	0.05	0.267848
(14) Deferred Basic Ld Val, RM/ha				11312
(15) M V (11)+(14), RM/ha				43550
(12) Net Present Value of Oil palm Total for a 25 year period			RM/ha/yr-25	32238
			$/ha yr -25	10074.4
(13) Averaged Net Present Value of Oil Palm per hectare			RM/ha/yr-1	1289.52
			$/ha yr -1	402.975
Table S2(b)_"Underproductive at 75%" at 51% capacity (69 SPH)			Planted out			Young mature				Mature													Old Mature
Year, After Planting			0	1	2	3	4	5	6	7	8	9	10	11	12	13	14	15	16	17	18	19	20	21	22	23	24
	0		2011	2012	2013	2014	2015	2016	2017	2018	2019	2020	2021	2022	2023	2024	2025	2026	2027	2028	2029	2030	2031	2032	2033	2034	2035
REVENUE
(1) Projected Yield, t/FFB/ha	Underproductive at 75%	0.51	0	0	3.06	8.16	10.71	12.495	13.77	14.28	15.3	15.3	15.3	15.3	15.045	14.535	14.025	13.515	13.26	12.495	11.985	11.475	10.965	10.455	9.945	9.435	8.67
(2) Price, RM/tFFB (2011price RM535 t/FFB) + Premium		535	0	0	535	535	535	535	535	535	535	535	535	535	535	535	535	535	535	535	535	535	535	535	535	535	535
(3) Income (1)*(2), at RM/ha			0	0	1637.1	4365.6	5729.85	6684.82	7366.95	7639.8	8185.5	8185.5	8185.5	8185.5	8049.07	7776.22	7503.38	7230.53	7094.1	6684.82	6411.97	6139.12	5866.27	5593.43	5320.57	5047.73	4638.45
OPPERATION COSTS
(4) Non-recurrent costs for New Plantings (RM/ha)			0	0	0	0	0	0	0	0	0	0	0	0	0	0	0	0	0	0	0	0	0	0	0	0	1
(5) General Charges (or Joint estate costs), RM/ha			650	650	650	650	650	650	650	650	650	650	650	650	650	650	650	650	650	650	650	650	650	650	650	650	650
(6) Field Upkeep, RM/ha
Weeding/Lallang			450	250	200	200	180	150	150	150	150	150	150	150	150	150	150	150	150	150	150	150	150	150	150	150	150
Manuring (or Fertiliser, Application, Foliar analysis)			500	1000	1800	1800	1800	1800	1800	1800	1800	1800	1800	1800	1800	1800	1800	1800	1800	1800	1800	1800	1800	1800	1800	1800	1800
Pruning			15	15	30	30	30	30	30	30	30	30	30	30	30	30	30	30	30	30	30	37.5	37.5	37.5	37.5	37.5	37.5
Pests & Diseases			30	15	5	5	5	5	5	5	5	5	5	5	5	5	5	5	5	5	5	5	5	5	5	5	5
Census/Survey/Supplying			187.5	62.5	10	10	10	10	10	10	10	10	10	10	10	10	10	10	10	10	10	10	10	10	10	10	10
Roads, Bridges, Paths, Drains			200	200	200	200	200	200	200	200	200	200	200	200	200	200	200	200	200	200	200	200	200	200	200	200	200
Soil/Water Conservation			15	15	10	10	10	10	10	10	10	10	10	10	10	10	10	10	10	10	10	10	10	10	10	10	10
Ablation			100	30	25	0	0	0	0	0	0	0	0	0	0	0	0	0	0	0	0	0	0	0	0	0	0
Boundaries and survey/cover crops			188.47	100.48	53.34	0	0	0	0	0	0	0	0	0	0	0	0	0	0	0	0	0	0	0	0	0	0
Mandore wages/direct field supervision			35.98	35.98	35.98	35.98	35.98	35.98	35.98	35.98	35.98	35.98	35.98	35.98	35.98	35.98	35.98	35.98	35.98	35.98	35.98	35.98	35.98	35.98	35.98	35.98	35.98
Tools			2	2	2	2	2	2	2	2	2	2	2	2	2	2	2	2	2	2	2	2	2	2	2	2	2
Miscellaneous/Sundry expenses			20	20	20	20	20	20	20	20	20	20	20	20	20	20	20	20	20	20	20	20	20	20	20	20	20
Total Field Upkeep, RM/ha			1743.95	1745.96	2391.32	2312.98	2292.98	2262.98	2262.98	2262.98	2262.98	2262.98	2262.98	2262.98	2262.98	2262.98	2262.98	2262.98	2262.98	2262.98	2262.98	2270.48	2270.48	2270.48	2270.48	2270.48	2270.48
(7) Harvestingting/Transpt, at RM/tFFB		50	0	0	153	408	535.5	624.75	688.5	714	765	765	765	765	752.25	726.75	701.25	675.75	663	624.75	599.25	631.125	570.18	543.66	517.14	490.62	450.84
(9) Total Costs, (4)+(5)+(6)+(7), (8) RM/ha			2393.95	2395.96	3194.32	3370.98	3478.48	3537.73	3601.48	3626.98	3677.98	3677.98	3677.98	3677.98	3665.23	3639.73	3614.23	3588.73	3575.98	3537.73	3512.23	3551.61	3490.66	3464.14	3437.62	3411.1	3372.32
(10) Net Income (3)-(8), RM/ha			-2393.95	-2395.96	-1557.22	994.62	2251.37	3147.09	3765.47	4012.82	4507.52	4507.52	4507.52	4507.52	4383.84	4136.49	3889.14	3641.8	3518.12	3147.09	2899.74	2587.52	2375.61	2129.29	1882.95	1636.63	1266.13
(11) Capitalised (NPV), RM/ha @		0.11		14320
(12) Reversion Basic Ld Val, RM/ha			42231
(13) Defer Over Cropping Life @	25	0.05	0.267848
(14) Deferred Basic Ld Val, RM/ha				11312
(15) M V (11)+(14), RM/ha				25632
(12) Net Present Value of Oil palm Total for a 25 year period			RM/ha/yr-25	14320
			$/ha yr -25	4475
(13) Averaged Net Present Value of Oil Palm per hectare			RM/ha/yr-1	572.8
			$/ha yr -1	179
Year, After Planting			0	1	2	3	4	5	6	7	8	9	10	11	12	13	14	15	16	17	18	19	20	21	22	23	24
(1) Projected Yield, t/FFB/ha	Underproductive at 75%	75% SPH	0	0	4.5	12	15.75	18.375	20.25	21	22.5	22.5	22.5	22.5	22.125	21.375	20.625	19.875	19.5	18.375	17.625	16.875	16.125	15.375	14.625	13.875	12.75
(1) Projected Yield, t/FFB/ha	Underproductive at 75%	51% SPH	0	0	3.06	8.16	10.71	12.495	13.77	14.28	15.3	15.3	15.3	15.3	15.045	14.535	14.025	13.515	13.26	12.495	11.985	11.475	10.965	10.455	9.945	9.435	8.67

## Sheet: Table S3(a + b) U at 50%
COST OF PRODUCTION:
Buisness-as-Usual with FULL STAND (135 palms per hectare)
Discount rate			0.11
Conversion rate US$1 = RM3.2 (Malaysian Ringgit)			3.2
Cropping life (years)			25
Table S3(a)_"Underproductive at 50%" at 50% capacity (68 SPH)			Planted out			Young mature				Mature													Old Mature
Year, After Planting			0	1	2	3	4	5	6	7	8	9	10	11	12	13	14	15	16	17	18	19	20	21	22	23	24
	0		2011	2012	2013	2014	2015	2016	2017	2018	2019	2020	2021	2022	2023	2024	2025	2026	2027	2028	2029	2030	2031	2032	2033	2034	2035
REVENUE
(1) Projected Yield, t/FFB/ha	Underproductive at 50%		0	0	3	8	10.5	12.25	13.5	14	15	15	15	15	14.75	14.25	13.75	13.25	13	12.25	11.75	11.25	10.75	10.25	9.75	9.25	8.5
(2) Price, RM/tFFB (2011price RM535 t/FFB) + Premium		535	0	0	535	535	535	535	535	535	535	535	535	535	535	535	535	535	535	535	535	535	535	535	535	535	535
(3) Income (1)*(2), at RM/ha			0	0	1605	4280	5617.5	6553.75	7222.5	7490	8025	8025	8025	8025	7891.25	7623.75	7356.25	7088.75	6955	6553.75	6286.25	6018.75	5751.25	5483.75	5216.25	4948.75	4547.5
OPPERATION COSTS
(4) Non-recurrent costs for New Plantings (RM/ha)			0	0	0	0	0	0	0	0	0	0	0	0	0	0	0	0	0	0	0	0	0	0	0	0	1
(5) General Charges (or Joint estate costs), RM/ha			650	650	650	650	650	650	650	650	650	650	650	650	650	650	650	650	650	650	650	650	650	650	650	650	650
(6) Field Upkeep, RM/ha
Weeding/Lallang			450	250	200	200	180	150	150	150	150	150	150	150	150	150	150	150	150	150	150	150	150	150	150	150	150
Manuring (or Fertiliser, Application, Foliar analysis)			500	1000	1800	1800	1800	1800	1800	1800	1800	1800	1800	1800	1800	1800	1800	1800	1800	1800	1800	1800	1800	1800	1800	1800	1800
Pruning			15	15	30	30	30	30	30	30	30	30	30	30	30	30	30	30	30	30	30	37.5	37.5	37.5	37.5	37.5	37.5
Pests & Diseases			30	15	5	5	5	5	5	5	5	5	5	5	5	5	5	5	5	5	5	5	5	5	5	5	5
Census/Survey/Supplying			225	75	10	10	10	10	10	10	10	10	10	10	10	10	10	10	10	10	10	10	10	10	10	10	10
Roads, Bridges, Paths, Drains			200	200	200	200	200	200	200	200	200	200	200	200	200	200	200	200	200	200	200	200	200	200	200	200	200
Soil/Water Conservation			15	15	10	10	10	10	10	10	10	10	10	10	10	10	10	10	10	10	10	10	10	10	10	10	10
Ablation			100	30	25	0	0	0	0	0	0	0	0	0	0	0	0	0	0	0	0	0	0	0	0	0	0
Boundaries and survey/cover crops			188.47	100.48	53.34	0	0	0	0	0	0	0	0	0	0	0	0	0	0	0	0	0	0	0	0	0	0
Mandore wages/direct field supervision			35.98	35.98	35.98	35.98	35.98	35.98	35.98	35.98	35.98	35.98	35.98	35.98	35.98	35.98	35.98	35.98	35.98	35.98	35.98	35.98	35.98	35.98	35.98	35.98	35.98
Tools			2	2	2	2	2	2	2	2	2	2	2	2	2	2	2	2	2	2	2	2	2	2	2	2	2
Miscellaneous/Sundry expenses			20	20	20	20	20	20	20	20	20	20	20	20	20	20	20	20	20	20	20	20	20	20	20	20	20
Total Field Upkeep, RM/ha			1781.45	1758.46	2391.32	2312.98	2292.98	2262.98	2262.98	2262.98	2262.98	2262.98	2262.98	2262.98	2262.98	2262.98	2262.98	2262.98	2262.98	2262.98	2262.98	2270.48	2270.48	2270.48	2270.48	2270.48	2270.48
(7) Harvestingting/Transpt, at RM/tFFB		50	0	0	150	400	525	612.5	675	700	750	750	750	750	737.5	712.5	687.5	662.5	650	612.5	587.5	618.75	559	533	507	481	442
(9) Total Costs, (4)+(5)+(6)+(7), (8) RM/ha			2431.45	2408.46	3191.32	3362.98	3467.98	3525.48	3587.98	3612.98	3662.98	3662.98	3662.98	3662.98	3650.48	3625.48	3600.48	3575.48	3562.98	3525.48	3500.48	3539.23	3479.48	3453.48	3427.48	3401.48	3363.48
(10) Net Income (3)-(8), RM/ha			-2431.45	-2408.46	-1586.32	917.02	2149.52	3028.27	3634.52	3877.02	4362.02	4362.02	4362.02	4362.02	4240.77	3998.27	3755.77	3513.27	3392.02	3028.27	2785.77	2479.52	2271.77	2030.27	1788.77	1547.27	1184.02
(11) Capitalised (NPV), RM/ha @		0.11		13528
(12) Reversion Basic Ld Val, RM/ha			42231
(13) Defer Over Cropping Life @	25	0.05	0.267848
(14) Deferred Basic Ld Val, RM/ha				11312
(15) M V (11)+(14), RM/ha				24840
(12) Net Present Value of Oil palm Total for a 25 year period			RM/ha/yr-25	13528
			$/ha yr -25	4227.5
(13) Averaged Net Present Value of Oil Palm per hectare			RM/ha/yr-1	541.12
			$/ha yr -1	169.1
Table S3(b)_"Underproductive at 50%" at 26% capacity (35 SPH)			Planted out			Young mature				Mature													Old Mature
Year, After Planting			0	1	2	3	4	5	6	7	8	9	10	11	12	13	14	15	16	17	18	19	20	21	22	23	24
	0		2011	2012	2013	2014	2015	2016	2017	2018	2019	2020	2021	2022	2023	2024	2025	2026	2027	2028	2029	2030	2031	2032	2033	2034	2035
REVENUE
(1) Projected Yield, t/FFB/ha	Underproductive at 50%		0	0	1.56	4.16	5.46	6.37	7.02	7.28	7.8	7.8	7.8	7.8	7.67	7.41	7.15	6.89	6.76	6.37	6.11	5.85	5.59	5.33	5.07	4.81	4.42
(2) Price, RM/tFFB (2011price RM535 t/FFB) + Premium		535	0	0	535	535	535	535	535	535	535	535	535	535	535	535	535	535	535	535	535	535	535	535	535	535	535
(3) Income (1)*(2), at RM/ha			0	0	834.6	2225.6	2921.1	3407.95	3755.7	3894.8	4173	4173	4173	4173	4103.45	3964.35	3825.25	3686.15	3616.6	3407.95	3268.85	3129.75	2990.65	2851.55	2712.45	2573.35	2364.7
OPPERATION COSTS
(4) Non-recurrent costs for New Plantings (RM/ha)			0	0	0	0	0	0	0	0	0	0	0	0	0	0	0	0	0	0	0	0	0	0	0	0	1
(5) General Charges (or Joint estate costs), RM/ha			650	650	650	650	650	650	650	650	650	650	650	650	650	650	650	650	650	650	650	650	650	650	650	650	650
(6) Field Upkeep, RM/ha
Weeding/Lallang			450	250	200	200	180	150	150	150	150	150	150	150	150	150	150	150	150	150	150	150	150	150	150	150	150
Manuring (or Fertiliser, Application, Foliar analysis)			500	1000	1800	1800	1800	1800	1800	1800	1800	1800	1800	1800	1800	1800	1800	1800	1800	1800	1800	1800	1800	1800	1800	1800	1800
Pruning			15	15	30	30	30	30	30	30	30	30	30	30	30	30	30	30	30	30	30	37.5	37.5	37.5	37.5	37.5	37.5
Pests & Diseases			30	15	5	5	5	5	5	5	5	5	5	5	5	5	5	5	5	5	5	5	5	5	5	5	5
Census/Survey/Supplying			225	75	10	10	10	10	10	10	10	10	10	10	10	10	10	10	10	10	10	10	10	10	10	10	10
Roads, Bridges, Paths, Drains			200	200	200	200	200	200	200	200	200	200	200	200	200	200	200	200	200	200	200	200	200	200	200	200	200
Soil/Water Conservation			15	15	10	10	10	10	10	10	10	10	10	10	10	10	10	10	10	10	10	10	10	10	10	10	10
Ablation			100	30	25	0	0	0	0	0	0	0	0	0	0	0	0	0	0	0	0	0	0	0	0	0	0
Boundaries and survey/cover crops			188.47	100.48	53.34	0	0	0	0	0	0	0	0	0	0	0	0	0	0	0	0	0	0	0	0	0	0
Mandore wages/direct field supervision			35.98	35.98	35.98	35.98	35.98	35.98	35.98	35.98	35.98	35.98	35.98	35.98	35.98	35.98	35.98	35.98	35.98	35.98	35.98	35.98	35.98	35.98	35.98	35.98	35.98
Tools			2	2	2	2	2	2	2	2	2	2	2	2	2	2	2	2	2	2	2	2	2	2	2	2	2
Miscellaneous/Sundry expenses			20	20	20	20	20	20	20	20	20	20	20	20	20	20	20	20	20	20	20	20	20	20	20	20	20
Total Field Upkeep, RM/ha			1781.45	1758.46	2391.32	2312.98	2292.98	2262.98	2262.98	2262.98	2262.98	2262.98	2262.98	2262.98	2262.98	2262.98	2262.98	2262.98	2262.98	2262.98	2262.98	2270.48	2270.48	2270.48	2270.48	2270.48	2270.48
(7) Harvestingting/Transpt, at RM/tFFB		50	0	0	78	208	273	318.5	351	364	390	390	390	390	383.5	370.5	357.5	344.5	338	318.5	305.5	321.75	290.68	277.16	263.64	250.12	229.84
(9) Total Costs, (4)+(5)+(6)+(7), (8) RM/ha			2431.45	2408.46	3119.32	3170.98	3215.98	3231.48	3263.98	3276.98	3302.98	3302.98	3302.98	3302.98	3296.48	3283.48	3270.48	3257.48	3250.98	3231.48	3218.48	3242.23	3211.16	3197.64	3184.12	3170.6	3151.32
(10) Net Income (3)-(8), RM/ha			-2431.45	-2408.46	-2284.72	-945.38	-294.88	176.47	491.72	617.82	870.02	870.02	870.02	870.02	806.97	680.87	554.77	428.67	365.62	176.47	50.37	-112.48	-220.51	-346.09	-471.67	-597.25	-786.62
(11) Capitalised (NPV), RM/ha @		0.11		-4408
(12) Reversion Basic Ld Val, RM/ha			42231
(13) Defer Over Cropping Life @	25	0.05	0.267848
(14) Deferred Basic Ld Val, RM/ha				11312
(15) M V (11)+(14), RM/ha				6904
(12) Net Present Value of Oil palm Total for a 25 year period			RM/ha/yr-25	-4408
			$/ha yr -25	-1377.5
(13) Averaged Net Present Value of Oil Palm per hectare			RM/ha/yr-1	-176.32
			$/ha yr -1	-55.1
Year, After Planting			0	1	2	3	4	5	6	7	8	9	10	11	12	13	14	15	16	17	18	19	20	21	22	23	24
(1) Projected Yield, t/FFB/ha	Underproductive at 50%	50% SPH	0	0	3	8	10.5	12.25	13.5	14	15	15	15	15	14.75	14.25	13.75	13.25	13	12.25	11.75	11.25	10.75	10.25	9.75	9.25	8.5
(1) Projected Yield, t/FFB/ha	Underproductive at 50%	26% SPH	0	0	1.56	4.16	5.46	6.37	7.02	7.28	7.8	7.8	7.8	7.8	7.67	7.41	7.15	6.89	6.76	6.37	6.11	5.85	5.59	5.33	5.07	4.81	4.42

## Sheet: Table S4(a + b) U at 25%
COST OF PRODUCTION:
Buisness-as-Usual with FULL STAND (135 palms per hectare)
Discount rate			0.11
Conversion rate US$1 = RM3.2 (Malaysian Ringgit)			3.2
Cropping life (years)			25
Table S4(a)_"Underproductive at 25%" at 25% capacity (34 SPH)			Planted out			Young mature				Mature													Old Mature
Year, After Planting			0	1	2	3	4	5	6	7	8	9	10	11	12	13	14	15	16	17	18	19	20	21	22	23	24
	0		2011	2012	2013	2014	2015	2016	2017	2018	2019	2020	2021	2022	2023	2024	2025	2026	2027	2028	2029	2030	2031	2032	2033	2034	2035
REVENUE
(1) Projected Yield, t/FFB/ha	Underproductive at 25%		0	0	1.5	4	5.25	6.125	6.75	7	7.5	7.5	7.5	7.5	7.375	7.125	6.875	6.625	6.5	6.125	5.875	5.625	5.375	5.125	4.875	4.625	4.25
(2) Price, RM/tFFB (2011price RM535 t/FFB) + Premium		535	0	0	535	535	535	535	535	535	535	535	535	535	535	535	535	535	535	535	535	535	535	535	535	535	535
(3) Income (1)*(2), at RM/ha			0	0	802.5	2140	2808.75	3276.88	3611.25	3745	4012.5	4012.5	4012.5	4012.5	3945.62	3811.88	3678.12	3544.38	3477.5	3276.88	3143.12	3009.38	2875.62	2741.88	2608.12	2474.38	2273.75
OPPERATION COSTS
(4) Non-recurrent costs for New Plantings (RM/ha)			0	0	0	0	0	0	0	0	0	0	0	0	0	0	0	0	0	0	0	0	0	0	0	0	1
(5) General Charges (or Joint estate costs), RM/ha			650	650	650	650	650	650	650	650	650	650	650	650	650	650	650	650	650	650	650	650	650	650	650	650	650
(6) Field Upkeep, RM/ha
Weeding/Lallang			450	250	200	200	180	150	150	150	150	150	150	150	150	150	150	150	150	150	150	150	150	150	150	150	150
Manuring (or Fertiliser, Application, Foliar analysis)			500	1000	1800	1800	1800	1800	1800	1800	1800	1800	1800	1800	1800	1800	1800	1800	1800	1800	1800	1800	1800	1800	1800	1800	1800
Pruning			15	15	30	30	30	30	30	30	30	30	30	30	30	30	30	30	30	30	30	37.5	37.5	37.5	37.5	37.5	37.5
Pests & Diseases			30	15	5	5	5	5	5	5	5	5	5	5	5	5	5	5	5	5	5	5	5	5	5	5	5
Census/Survey/Supplying			262.5	87.5	10	10	10	10	10	10	10	10	10	10	10	10	10	10	10	10	10	10	10	10	10	10	10
Roads, Bridges, Paths, Drains			200	200	200	200	200	200	200	200	200	200	200	200	200	200	200	200	200	200	200	200	200	200	200	200	200
Soil/Water Conservation			15	15	10	10	10	10	10	10	10	10	10	10	10	10	10	10	10	10	10	10	10	10	10	10	10
Ablation			100	30	25	0	0	0	0	0	0	0	0	0	0	0	0	0	0	0	0	0	0	0	0	0	0
Boundaries and survey/cover crops			188.47	100.48	53.34	0	0	0	0	0	0	0	0	0	0	0	0	0	0	0	0	0	0	0	0	0	0
Mandore wages/direct field supervision			35.98	35.98	35.98	35.98	35.98	35.98	35.98	35.98	35.98	35.98	35.98	35.98	35.98	35.98	35.98	35.98	35.98	35.98	35.98	35.98	35.98	35.98	35.98	35.98	35.98
Tools			2	2	2	2	2	2	2	2	2	2	2	2	2	2	2	2	2	2	2	2	2	2	2	2	2
Miscellaneous/Sundry expenses			20	20	20	20	20	20	20	20	20	20	20	20	20	20	20	20	20	20	20	20	20	20	20	20	20
Total Field Upkeep, RM/ha			1818.95	1770.96	2391.32	2312.98	2292.98	2262.98	2262.98	2262.98	2262.98	2262.98	2262.98	2262.98	2262.98	2262.98	2262.98	2262.98	2262.98	2262.98	2262.98	2270.48	2270.48	2270.48	2270.48	2270.48	2270.48
(7) Harvestingting/Transpt, at RM/tFFB		50	0	0	75	200	262.5	306.25	337.5	350	375	375	375	375	368.75	356.25	343.75	331.25	325	306.25	293.75	309.375	279.5	266.5	253.5	240.5	221
(9) Total Costs, (4)+(5)+(6)+(7), (8) RM/ha			2468.95	2420.96	3116.32	3162.98	3205.48	3219.23	3250.48	3262.98	3287.98	3287.98	3287.98	3287.98	3281.73	3269.23	3256.73	3244.23	3237.98	3219.23	3206.73	3229.86	3199.98	3186.98	3173.98	3160.98	3142.48
(10) Net Income (3)-(8), RM/ha			-2468.95	-2420.96	-2313.82	-1022.98	-396.73	57.645	360.77	482.02	724.52	724.52	724.52	724.52	663.895	542.645	421.395	300.145	239.52	57.645	-63.605	-220.48	-324.355	-445.105	-565.855	-686.605	-868.73
(11) Capitalised (NPV), RM/ha @		0.11		-5199
(12) Reversion Basic Ld Val, RM/ha			42231
(13) Defer Over Cropping Life @	25	0.05	0.267848
(14) Deferred Basic Ld Val, RM/ha				11312
(15) M V (11)+(14), RM/ha				6113
(12) Net Present Value of Oil palm Total for a 25 year period			RM/ha/yr-25	-5199
			$/ha yr -25	-1624.69
(13) Averaged Net Present Value of Oil Palm per hectare			RM/ha/yr-1	-207.96
			$/ha yr -1	-64.9875
Table S4(b)_"Underproductive at 25%" at 0% capacity (0 SPH)			Planted out			Young mature				Mature													Old Mature
Year, After Planting			0	1	2	3	4	5	6	7	8	9	10	11	12	13	14	15	16	17	18	19	20	21	22	23	24
	#DIV/0!		2011	2012	2013	2014	2015	2016	2017	2018	2019	2020	2021	2022	2023	2024	2025	2026	2027	2028	2029	2030	2031	2032	2033	2034	2035
REVENUE
(1) Projected Yield, t/FFB/ha	Underproductive at 25%	0	0	0	0	0	0	0	0	0	0	0	0	0	0	0	0	0	0	0	0	0	0	0	0	0	0
(2) Price, RM/tFFB (2011price RM535 t/FFB) + Premium		535	0	0	535	535	535	535	535	535	535	535	535	535	535	535	535	535	535	535	535	535	535	535	535	535	535
(3) Income (1)*(2), at RM/ha			0	0	0	0	0	0	0	0	0	0	0	0	0	0	0	0	0	0	0	0	0	0	0	0	0
OPPERATION COSTS
(4) Non-recurrent costs for New Plantings (RM/ha)			0	0	0	0	0	0	0	0	0	0	0	0	0	0	0	0	0	0	0	0	0	0	0	0	1
(5) General Charges (or Joint estate costs), RM/ha			650	650	650	650	650	650	650	650	650	650	650	650	650	650	650	650	650	650	650	650	650	650	650	650	650
(6) Field Upkeep, RM/ha
Weeding/Lallang			450	250	200	200	180	150	150	150	150	150	150	150	150	150	150	150	150	150	150	150	150	150	150	150	150
Manuring (or Fertiliser, Application, Foliar analysis)			500	1000	1800	1800	1800	1800	1800	1800	1800	1800	1800	1800	1800	1800	1800	1800	1800	1800	1800	1800	1800	1800	1800	1800	1800
Pruning			15	15	30	30	30	30	30	30	30	30	30	30	30	30	30	30	30	30	30	37.5	37.5	37.5	37.5	37.5	37.5
Pests & Diseases			30	15	5	5	5	5	5	5	5	5	5	5	5	5	5	5	5	5	5	5	5	5	5	5	5
Census/Survey/Supplying			262.5	87.5	10	10	10	10	10	10	10	10	10	10	10	10	10	10	10	10	10	10	10	10	10	10	10
Roads, Bridges, Paths, Drains			200	200	200	200	200	200	200	200	200	200	200	200	200	200	200	200	200	200	200	200	200	200	200	200	200
Soil/Water Conservation			15	15	10	10	10	10	10	10	10	10	10	10	10	10	10	10	10	10	10	10	10	10	10	10	10
Ablation			100	30	25	0	0	0	0	0	0	0	0	0	0	0	0	0	0	0	0	0	0	0	0	0	0
Boundaries and survey/cover crops			188.47	100.48	53.34	0	0	0	0	0	0	0	0	0	0	0	0	0	0	0	0	0	0	0	0	0	0
Mandore wages/direct field supervision			35.98	35.98	35.98	35.98	35.98	35.98	35.98	35.98	35.98	35.98	35.98	35.98	35.98	35.98	35.98	35.98	35.98	35.98	35.98	35.98	35.98	35.98	35.98	35.98	35.98
Tools			2	2	2	2	2	2	2	2	2	2	2	2	2	2	2	2	2	2	2	2	2	2	2	2	2
Miscellaneous/Sundry expenses			20	20	20	20	20	20	20	20	20	20	20	20	20	20	20	20	20	20	20	20	20	20	20	20	20
Total Field Upkeep, RM/ha			1818.95	1770.96	2391.32	2312.98	2292.98	2262.98	2262.98	2262.98	2262.98	2262.98	2262.98	2262.98	2262.98	2262.98	2262.98	2262.98	2262.98	2262.98	2262.98	2270.48	2270.48	2270.48	2270.48	2270.48	2270.48
(7) Harvestingting/Transpt, at RM/tFFB		50	0	0	0	0	0	0	0	0	0	0	0	0	0	0	0	0	0	0	0	0	0	0	0	0	0
(9) Total Costs, (4)+(5)+(6)+(7), (8) RM/ha			2468.95	2420.96	3041.32	2962.98	2942.98	2912.98	2912.98	2912.98	2912.98	2912.98	2912.98	2912.98	2912.98	2912.98	2912.98	2912.98	2912.98	2912.98	2912.98	2920.48	2920.48	2920.48	2920.48	2920.48	2921.48
(10) Net Income (3)-(8), RM/ha			-2468.95	-2420.96	-3041.32	-2962.98	-2942.98	-2912.98	-2912.98	-2912.98	-2912.98	-2912.98	-2912.98	-2912.98	-2912.98	-2912.98	-2912.98	-2912.98	-2912.98	-2912.98	-2912.98	-2920.48	-2920.48	-2920.48	-2920.48	-2920.48	-2921.48
(11) Capitalised (NPV), RM/ha @		0.11		-23882
(12) Reversion Basic Ld Val, RM/ha			42231
(13) Defer Over Cropping Life @	25	0.05	0.267848
(14) Deferred Basic Ld Val, RM/ha				11312
(15) M V (11)+(14), RM/ha				-12570
(12) Net Present Value of Oil palm Total for a 25 year period			RM/ha/yr-25	-23882
			$/ha yr -25	-7463.12
(13) Averaged Net Present Value of Oil Palm per hectare			RM/ha/yr-1	-955.28
			$/ha yr -1	-298.525
Year, After Planting			0	1	2	3	4	5	6	7	8	9	10	11	12	13	14	15	16	17	18	19	20	21	22	23	24
(1) Projected Yield, t/FFB/ha	Underproductive at 25%	25% SPH	0	0	1.5	4	5.25	6.125	6.75	7	7.5	7.5	7.5	7.5	7.375	7.125	6.875	6.625	6.5	6.125	5.875	5.625	5.375	5.125	4.875	4.625	4.25
(1) Projected Yield, t/FFB/ha	Underproductive at 25%	0% SPH	0	0	0	0	0	0	0	0	0	0	0	0	0	0	0	0	0	0	0	0	0	0	0	0	0

## Sheet: Table S5 Discounted summaries
Table S5 Discounted summaries
Price RM/tFFB (2011price RM535 t/FFB)	Annual oil palm NPV discounted at:
	0.05	0.08	0.11	0.14
Full stand (based on 136 palms per hectare)	1252	881	637	471
Full stand (based on 103 palms per hectare)	831	579	413	300
Underproductive at 75% (based on 102 palms per hectare)	812	565	403	293
Underproductive at 75% (based on 69 palms per hectare)	392	263	179	122
Underproductive at 50% (based on 68 palms per hectare)	374	250	169	114
Underproductive at 50% (based on 35 palms per hectare)	-48	-52	-55	-57
Underproductive at 25% (based on 34 palms per hectare)	-66	-65	-65	-64
Underproductive at 25% (based on 0 palms per hectare)	-505	-380	-299	-242
Price RM/tFFB (2014price RM490 t/FFB)	Annual oil palm NPV discounted at:
	0.05	0.08	0.11	0.14
Fullstand	1089	764	551	405
Underproductive at 75%	690	478	338	243
Underproductive at 50%	292	192	126	81
Underproductive at <25%	-107	-95	-87	-81

## Sheet: Figure S2
	Predicted yields (t FFB/ha) in year(s) after planting
Four economic model classes	0	1	2	3	4	5	6	7	8	9	10	11	12	13	14	15	16	17	18	19	20	21	22	23	24
Full stand (based on 136 palms per hectare)	0	0	6	16	21	24.5	27	28	30	30	30	30	29.5	28.5	27.5	26.5	26	24.5	23.5	22.5	21.5	20.5	19.5	18.5	17
Full stand (based on 103 palms per hectare)	0	0	4.56	12.16	15.96	18.62	20.52	21.28	22.8	22.8	22.8	22.8	22.42	21.66	20.9	20.14	19.76	18.62	17.86	17.1	16.34	15.58	14.82	14.06	12.92
Underproductive at 75% (based on 102 palms per hectare)	0	0	4.5	12	15.75	18.375	20.25	21	22.5	22.5	22.5	22.5	22.125	21.375	20.625	19.875	19.5	18.375	17.625	16.875	16.125	15.375	14.625	13.875	12.25
Underproductive at 75% (based on 69 palms per hectare)	0	0	3.06	8.16	10.71	12.495	13.77	14.28	15.3	15.3	15.3	15.3	15.045	14.535	14.025	13.515	13.26	12.495	11.985	11.475	10.965	10.455	9.945	9.435	8.67
Underproductive at 50% (based on 68 palms per hectare)	0	0	3	8	10.5	12.25	13.5	14	15	15	15	15	14.75	14.25	13.75	13.25	13	12.25	11.75	11.25	10.75	10.25	9.75	9.25	8.5
Underproductive at 50% (based on 35 palms per hectare)	0	0	1.56	4.16	5.46	6.37	7.02	7.28	7.8	7.8	7.8	7.8	7.67	7.41	7.15	6.89	6.76	6.37	6.11	5.85	5.59	5.33	5.07	4.81	4.42
Underproductive at 25% (based on 34 palms per hectare)	0	0	1.5	4	5.25	6.125	6.75	7	7.5	7.5	7.5	7.5	7.375	7.125	6.875	6.625	6.5	6.125	5.875	5.625	5.375	5.125	4.875	4.625	4.25
Underproductive at 25% (based on 0 palms per hectare)	0	0	0	0	0	0	0	0	0	0	0	0	0	0	0	0	0	0	0	0	0	0	0	0	0
Figure S2. Annual yield values used for the economic models. Upper and lower palm capacity values are shows for the four oil palm productivity classes.
